# Supplementary material for: Measurement and Modeling of Short and Medium Range Order in Amorphous Ta2O5 Thin Films
Source: PubMed Central journal article supplement (PMC4999889; doi:10.1038/srep32170), 2016-08-26
Supplement: srep32170-s1.pdf [file srep32170-s1.pdf]

# Supplementary Information: Measurement and Modeling of Short and Medium Range Order in Amorphous Ta<sub>2</sub>O<sub>5</sub> Thin Films

*Badri Shyam<sup>1</sup>, Kevin H. Stone<sup>1</sup>, Riccardo Bassiri<sup>2</sup>, Martin M. Fejer<sup>2</sup>, Michael F. Toney<sup>1</sup> and  
Apurva Mehta<sup>1\*</sup>*

<sup>1</sup>Stanford Synchrotron Radiation Lightsource, SLAC National Accelerator Laboratory,

Menlo Park CA 94025, United States

<sup>2</sup>Department of Applied Physics, Stanford University, Stanford CA 94305, United States

e-mail address: [mehta@slac.stanford.edu](mailto:mehta@slac.stanford.edu)

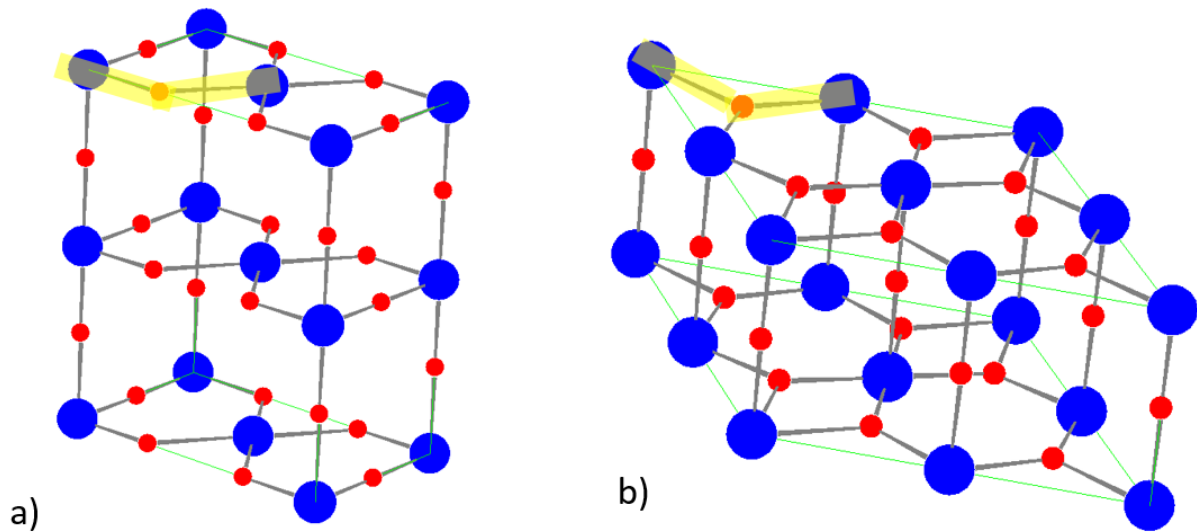

**Figure 1:** Schematic structure of a)  $\beta$ -Tantala, as reported by Aleshina and Loginova<sup>1</sup> b)  $\delta$ -Tantala as calculated by Fukumoto and Miwa.<sup>2</sup> The blue spheres indicate Ta ions and the red sphere indicate O ions. The kinked Ta-O-Ta PSU is high-lighted in yellow.

## References

1. Aleshina, L. A., & Loginova, S. V. Rietveld analysis of X-ray diffraction pattern from  $\beta$ -Ta<sub>2</sub>O<sub>5</sub> oxide. *Crystallogr. Rep.*, **47**, 415-419 (2002).
2. Fukumoto, A., & Miwa, K. Prediction of hexagonal Ta<sub>2</sub>O<sub>5</sub> structure by first-principles calculations. *Phys. Rev., B* **55**, 11155-11160 (1997).
